# Supplementary material for: METTL3 promotes proliferation and migration of colorectal cancer cells by increasing SNHG1 stability
Source: PubMed Central journal article supplement — Mol Med Rep. 2023 Sep 26;28(5):217. doi: 10.3892/mmr.2023.13104 (PMC10568253; doi:10.3892/mmr.2023.13104), 2023-09-26

Figure S1. Relative expression of SNHG1 after transfection of specific siSNHG1. The expression of SNHG1 in (A) HT29 and (B) LOVO cells, quantified using reverse transcription-quantitative PCR. \*\*\*\*P<0.0001 vs. siNC. SNHG1, small nucleolar RNA host gene 1; si, small interfering RNA; NC, negative control.

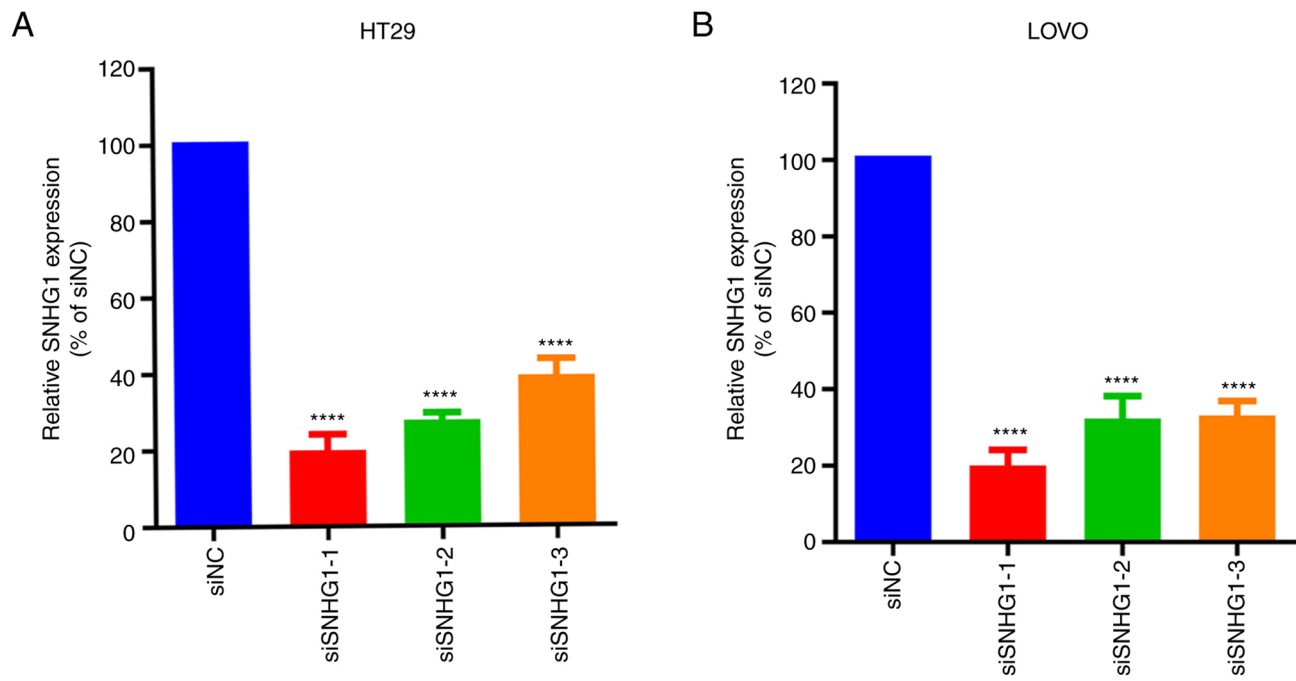

Supplement: Supplementary_Data1.pdf [file Supplementary_Data1.pdf]
