# Supplementary material for: METTL3 promotes proliferation and migration of colorectal cancer cells by increasing SNHG1 stability
Source: PubMed Central journal article supplement — Mol Med Rep. 2023 Sep 26;28(5):217. doi: 10.3892/mmr.2023.13104 (PMC10568253; doi:10.3892/mmr.2023.13104), 2023-09-26
Supplement: Supplementary_Data2.pdf [file Supplementary_Data2.pdf]

**Table S1.** m6A modification sites in human SNHG1 gene.

| ModChr | ModStart | ModEnd   | Strand | ModID              | ModType | Motif Score | SupportNum | GeneName        | GeneType                                 | Region                |
|--------|----------|----------|--------|--------------------|---------|-------------|------------|-----------------|------------------------------------------|-----------------------|
| chr11  | 62619719 | 62619720 | -      | m6A_sit<br>e_75441 | m6A     | 274.68      | 1          | SNHG1,<br>SNHG1 | lincRNA,<br>retained_intron              | Exon, exon            |
| chr11  | 62619752 | 62619753 | -      | m6A_sit<br>e_75442 | m6A     | 274.68      | 1          | SNHG1,<br>SNHG1 | lincRNA,<br>lincRNA,<br>retained_intron  | Exon, intron,<br>exon |
| chr11  | 62619758 | 62619759 | -      | m6A_sit<br>e_75443 | m6A     | 299.78      | 1          | SNHG1,<br>SNHG1 | lincRNA,<br>lincRNA,<br>retained_intron  | Exon, intron,<br>exon |
| chr11  | 62619793 | 62619794 | -      | m6A_sit<br>e_75444 | m6A     | 344.64      | 1          | SNHG1,<br>SNHG1 | lincRNA,<br>lincRNA,<br>retained_intron  | Intron, exon,<br>exon |
| chr11  | 62620007 | 62620008 | -      | m6A_sit<br>e_75445 | m6A     | 226.96      | 1          | SNHG1,<br>SNHG1 | lincRNA,<br>lincRNA,<br>retained_intron  | Exon, intron,<br>exon |
| chr11  | 62620025 | 62620026 | -      | m6A_sit<br>e_75446 | m6A     | 296.92      | 1          | SNHG1,<br>SNHG1 | lincRNA,<br>retained_intron<br>, lincRNA | Exon, exon,<br>intron |
| chr11  | 62620037 | 62620038 | -      | m6A_sit<br>e_75447 | m6A     | 296.92      | 1          | SNHG1,<br>SNHG1 | retained_intron<br>, lincRNA,<br>lincRNA | Exon, intron,<br>exon |
| chr11  | 62620394 | 62620395 | -      | m6A_sit            | m6A     | 349.63      | 2          | SNHG1,          | retained_intron                          | Exon, intron,         |

|       |          |          |   |                    |     |        |   |                 |                                                      |                         |
|-------|----------|----------|---|--------------------|-----|--------|---|-----------------|------------------------------------------------------|-------------------------|
|       |          |          |   | e_75448            |     |        |   | SNHG1           | ,<br>retained_intron<br>, lincRNA                    | intron                  |
| chr11 | 62620433 | 62620434 | - | m6A_sit<br>e_75449 | m6A | 419.59 | 2 | SNHG1,<br>SNHG1 | lincRNA,<br>retained_intron<br>,<br>retained_intron  | Intron, exon,<br>intron |
| chr11 | 62620443 | 62620444 | - | m6A_sit<br>e_75450 | m6A | 299.78 | 2 | SNHG1,<br>SNHG1 | retained_intron<br>,<br>retained_intron<br>, lincRNA | Exon, intron,<br>intron |
| chr11 | 62620493 | 62620494 | - | m6A_sit<br>e_75451 | m6A | 274.68 | 2 | SNHG1,<br>SNHG1 | lincRNA,<br>retained_intron<br>,<br>retained_intron  | Intron,<br>intron, exon |
| chr11 | 62621376 | 62621377 | - | m6A_sit<br>e_75452 | m6A | 274.68 | 1 | SNHG1,<br>SNHG1 | retained_intron<br>,<br>retained_intron<br>, lincRNA | Intron, exon,<br>intron |
| chr11 | 62621387 | 62621388 | - | m6A_sit<br>e_75453 | m6A | 301.91 | 1 | SNHG1,<br>SNHG1 | retained_intron<br>, lincRNA,<br>retained_intron     | Intron,<br>intron, exon |
| chr11 | 62621422 | 62621423 | - | m6A_sit            | m6A | 274.68 | 1 | SNHG1,          | lincRNA,                                             | Intron,                 |

|       |          |          |   |                |     |        |   |                 |                                                      |                         |
|-------|----------|----------|---|----------------|-----|--------|---|-----------------|------------------------------------------------------|-------------------------|
|       |          |          |   | e_75454        |     |        |   | SNHG1           | retained_intron<br>,<br>retained_intron              | intron, exon            |
| chr11 | 62622516 | 62622517 | - | m6A_site_75455 | m6A | 349.63 | 1 | SNHG1,<br>SNHG1 | retained_intron<br>, lincRNA,<br>retained_intron     | Exon, intron,<br>intron |
| chr11 | 62622542 | 62622543 | - | m6A_site_75456 | m6A | 301.91 | 1 | SNHG1,<br>SNHG1 | retained_intron<br>,<br>retained_intron<br>, lincRNA | Exon, intron,<br>intron |
| chr11 | 62622569 | 62622570 | - | m6A_site_75457 | m6A | 294.79 | 1 | SNHG1,<br>SNHG1 | lincRNA,<br>retained_intron<br>,<br>retained_intron  | Intron,<br>intron, exon |
| chr11 | 62623253 | 62623254 | - | m6A_site_75458 | m6A | 301.91 | 2 | SNHG1,<br>SNHG1 | lincRNA,<br>lincRNA,<br>retained_intron              | Exon, intron,<br>exon   |

m6A, N<sup>6</sup>-methyladenosine; SNHG1, small nucleolar RNA host gene 1; lincRNA, long intergenic noncoding RNA; ModChr, modified chromosome; ModStart, modified chromosome start site ModEnd, modified chromosome end site; ModID, modified site identification number; ModType, modification category; SupportNum, number of eligible parts in position.

**Table SII.** Relationships between SNHG1 m6A modifications and METTL3 binding regions in humans.

| <b>RBP ID</b>       | <b>ModID</b>       | <b>ModType</b> | <b>SupportNum</b> | <b>RBPname</b> | <b>RBPtype</b> | <b>ClipExpNum</b> | <b>GeneName</b>           | <b>GeneType</b>                                 | <b>Region</b>              |
|---------------------|--------------------|----------------|-------------------|----------------|----------------|-------------------|---------------------------|-------------------------------------------------|----------------------------|
| RBP_site_<br>485490 | m6A_sit<br>e_75456 | m6A            | 1                 | METTL3         | Writer         | 1                 | SNHG1,<br>SNHG1,<br>SNHG1 | retained_intron,<br>retained_intron, lincRNA    | Exon,<br>intron,<br>Intron |
| RBP_site_<br>485347 | m6A_sit<br>e_75454 | m6A            | 1                 | METTL3         | Writer         | 1                 | SNHG1,<br>SNHG1,<br>SNHG1 | lincRNA,<br>retained_intron,<br>retained_intron | Intron,<br>intron, exon    |
| RBP_site_<br>485275 | m6A_sit<br>e_75453 | m6A            | 1                 | METTL3         | Writer         | 1                 | SNHG1,<br>SNHG1,<br>SNHG1 | retained_intron,<br>lincRNA, retained_intron    | Intron,<br>intron, exon    |
| RBP_site_<br>484970 | m6A_sit<br>e_75451 | m6A            | 2                 | METTL3         | Writer         | 1                 | SNHG1,<br>SNHG1,<br>SNHG1 | lincRNA,<br>retained_intron,<br>retained_intron | Intron,<br>intron, exon    |
| RBP_site_<br>484912 | m6A_sit<br>e_75450 | m6A            | 2                 | METTL3         | Writer         | 1                 | SNHG1,<br>SNHG1,<br>SNHG1 | retained_intron,<br>retained_intron, lincRNA    | Exon,<br>intron,<br>intron |
| RBP_site_<br>484835 | m6A_sit<br>e_75449 | m6A            | 2                 | METTL3         | Writer         | 1                 | SNHG1,<br>SNHG1,<br>SNHG1 | lincRNA,<br>retained_intron,<br>retained_intron | Intron,<br>exon, intron    |

SNHG1, small nucleolar RNA host gene 1; m6A, N<sup>6</sup>-methyladenosine; METTL3, methyltransferase-like 3; lincRNA, long intergenic noncoding RNA; RBP, RNA-binding protein; RBP ID, identification number of RBP site; RBPTyp, class of associated RBP protein; ModID, modified site identification number; ModType, modification category; SupportNum, number of eligible parts in position; ClipExpNum, number of binding sites between modification and binding region.
